# Supplementary material for: The Novel Synthetic Antibiotic BDTL049 Based on a Dendritic System Induces Lipid Domain Formation while Escaping the Cell Envelope Stress Resistance Determinants
Source: MDPI journal article supplement (doi:10.3390/pharmaceutics15010297), 2023-01-16
Supplement: s1 [file s1]

## Supporting Material

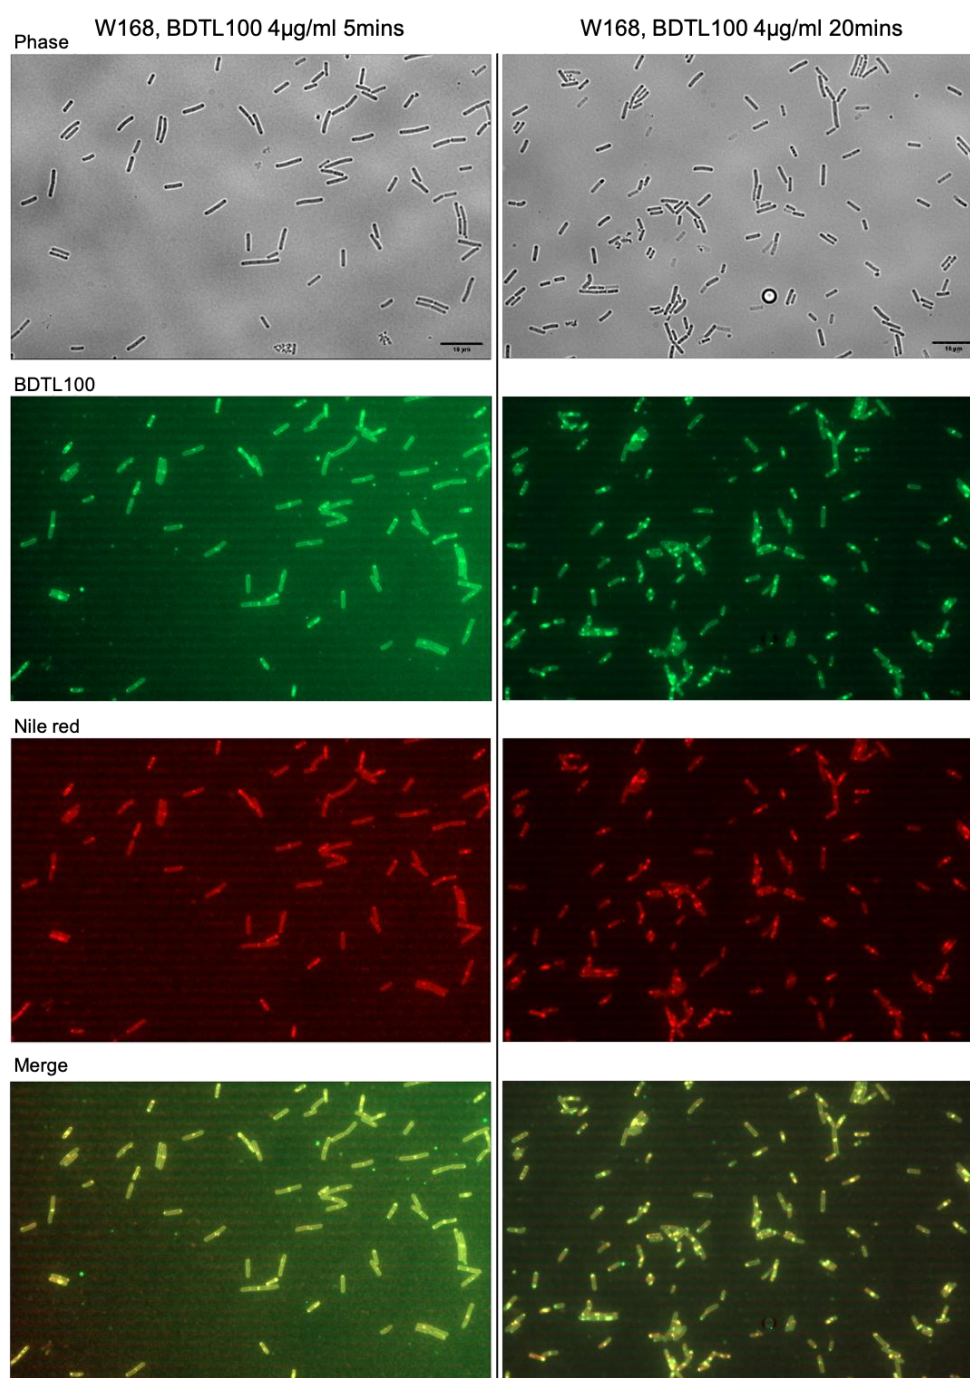

**Supplement Figure S1.** Effect of BDTL100 on *B. subtilis* membranes lipid packing state after 5 (left) and 20 (right) minutes, respectively. Top panels show phase contrast, followed by BDTL100 and Nile red fluorescence. Bottom shows merge. Scale bar is set to 10 μm.

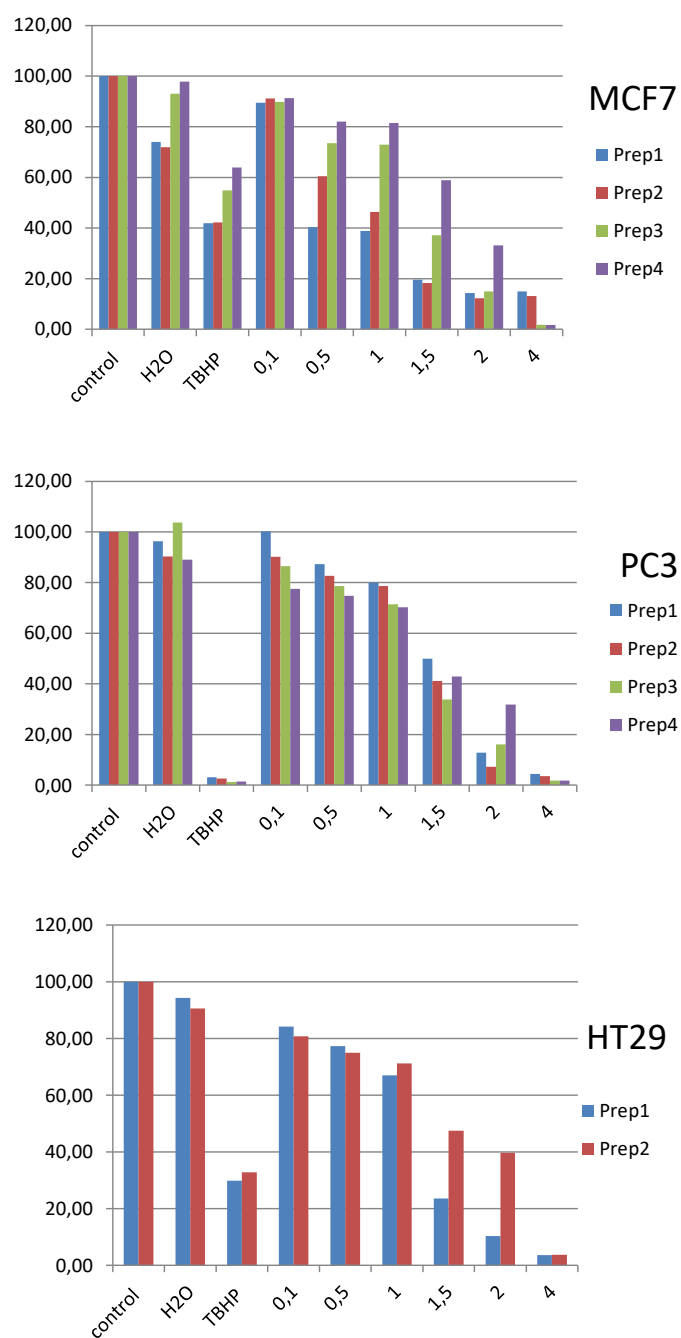

**Supplement Figure S2.** Cytotoxicity of BDTL049 at varying concentrations against three different human cell lines *in vitro*. Data represent biological replicates.
